# Supplementary material for: Cattle mitogenome variation reveals a post-glacial expansion of haplogroup P and an early incorporation into northeast Asian domestic herds
Source: PubMed Central journal article supplement (PMC7704668; doi:10.1038/s41598-020-78040-8), 2020-11-30
Supplement: 41598_2020_78040_MOESM1_ESM.pdf [file 41598_2020_78040_MOESM1_ESM.pdf]

## Supplementary Information

Title: Cattle mitogenome variation reveals a post-glacial expansion of haplogroup P and an early incorporation into northeast Asian domestic herds

Hideyuki Mannen, Takahiro Yonezawa, Kako Murata, Aoi Noda, Fuki Kawaguchi, Shinji Sasazaki, Anna Olivieri, Alessandro Achilli,

& Antonio Torroni

**Table S1. Coalescence times of cattle haplogroups estimated by ML method (years ago)**

| Node <sup>1</sup> | with Aurochs <sup>2</sup> |                        | without Aurochs <sup>2</sup> |                  |
|-------------------|---------------------------|------------------------|------------------------------|------------------|
|                   | CDS <sup>3</sup>          | 3rd codon <sup>3</sup> | CDS                          | 3rd codon        |
| Node 1            | 335,000                   | 335,000                | 335,000                      | 335,000          |
| Node 2            | 38,030 ± 8,630            | 43,240 ± 10,510        | 37,970 ± 8,620               | 43,140 ± 10,500  |
| Node 3            | 137,420 ± 15,520          | 144,100 ± 17,810       | 136,550 ± 15,520             | 143,470 ± 17,820 |
| Node 4            | 46,040 ± 9,630            | 41,190 ± 10,460        | 45,890 ± 9,610               | 41,010 ± 10,430  |
| Node 5            | 4,160 ± 2,440             | 1,720 ± 1,910          | 4,150 ± 2,440                | 1,710 ± 1,900    |
| Node 6            | 65,990 ± 9,640            | 67,580 ± 11,110        | 64,690 ± 9,720               | 66,820 ± 11,150  |
| Node 7            | 16,180 ± 4,560            | 8,770 ± 3,650          | NA <sup>4</sup>              | NA               |
| Node 8            | 12,530 ± 4,010            | 8,770 ± 3,620          | NA                           | NA               |
| Node 9            | 3,720 ± 1,770             | 2,900 ± 1,980          | 3,580 ± 1,510                | 2,790 ± 1,610    |
| Node 10           | 47,000 ± 7,950            | 47,950 ± 9,100         | 16,570 ± 3,380               | 12,990 ± 3,510   |
| Node 11           | 16,630 ± 3,450            | 13,040 ± 3,610         | 16,570 ± 3,360               | 12,990 ± 3,450   |
| Node 12           | 16,630 ± 3,390            | 13,040 ± 3,520         | 16,570 ± 3,370               | 12,990 ± 3,450   |
| Node 13           | 2,410 ± 2,360             | 0 ± 590                | 13,730 ± 3,970               | 17,520 ± 5,090   |
| Node 14           | 17,250 ± 4,520            | 21,670 ± 5,760         | 8,420 ± 3,050                | 10,820 ± 3,920   |
| Node 15           | 8,450 ± 3,060             | 10,870 ± 3,940         | 12,950 ± 2,720               | 11,560 ± 4,510   |
| Node 16           | 12,990 ± 2,820            | 11,610 ± 4,610         | 12,950 ± 2,660               | 11,560 ± 4,500   |
| Node 17           | 10,990 ± 3,810            | 4,990 ± 3,020          | 10,930 ± 3,780               | 4,950 ± 2,920    |

<sup>1</sup>Node numbers correspond to those in Fig. S2. Nodes 7, 8 and 9 correspond to P, P1 and P1a, respectively.

<sup>2</sup>with/without aurochs: analysis with/without mitogenome sequences of aurochs.

<sup>3</sup>Analysis using all substitutions in protein-coding regions or only 3rd codon substitutions.

<sup>4</sup>NA: not applicable.

a

| region                         | D-loop                                                                                                                                                                                                    |  |  |  |  |  |  |  |  |  |  |  |  |  |  |  |  |  | 16S rRNA | ND1 | ND2 | CoI | CoII | ATPase 8 | ATPase 6 | ND3 | ND4 | ND5 | ND6 | Cytb | tRNA / Thr |
|--------------------------------|-----------------------------------------------------------------------------------------------------------------------------------------------------------------------------------------------------------|--|--|--|--|--|--|--|--|--|--|--|--|--|--|--|--|--|----------|-----|-----|-----|------|----------|----------|-----|-----|-----|-----|------|------------|
| position                       |                                                                                                                                                                                                           |  |  |  |  |  |  |  |  |  |  |  |  |  |  |  |  |  |          |     |     |     |      |          |          |     |     |     |     |      |            |
| Haplotype (accession Nos.) [N] | T C A T C T C T T T T G T T T C C C T G C T A A A C - T T G C A C - A G G G C G T G T G T G T C T C A G T C T T C A T G T A T C A T C A G C C C A G C C T C T T T T C G C C T A A T A G G G C C A T C     |  |  |  |  |  |  |  |  |  |  |  |  |  |  |  |  |  |          |     |     |     |      |          |          |     |     |     |     |      |            |
| T3 (V00654)                    | T C A T C T C T T T T G T T T C C C T G C T A A A C - T T G C A C - A G G G C G T G T G T G T C T C A G T C T T C A T G T A T C A T C A G C C C A G C C T C T T T T C G C C T A A T A G G G C C A T C     |  |  |  |  |  |  |  |  |  |  |  |  |  |  |  |  |  |          |     |     |     |      |          |          |     |     |     |     |      |            |
| JS1 (LC537308)[4]              | C G G . T C T . C C . . C . . T T . C A . C G . . T C . C A T . . C G A . A A A C . . . C A . . C T G A . T C C T G C A . G C T G C T C C T G T G A . . . C . C C C . . T T C G C . G A T . A T . G C T   |  |  |  |  |  |  |  |  |  |  |  |  |  |  |  |  |  |          |     |     |     |      |          |          |     |     |     |     |      |            |
| JS2 (LC537309) [1]             | C G G . T C T . C C . . C . . T T . C A . C G G . T C . C A T . . C G A . A A A C . . . C A . . C T G A . T C C T G C A . G . T G C T C C T G T G A . . . C . C C C . . T T C G C . G A T . A T . G C T   |  |  |  |  |  |  |  |  |  |  |  |  |  |  |  |  |  |          |     |     |     |      |          |          |     |     |     |     |      |            |
| JS3 (LC537310)[2]              | C G G . T C T . C C . . C C . . T T . C A . C G . . T C . C A T . . C G A . A A A C . . . C A . . C T G A . T C C T G C A . G . T G C T C C T G T G A . . . C T C C C . . T T C G C . G A T . A T . G C T |  |  |  |  |  |  |  |  |  |  |  |  |  |  |  |  |  |          |     |     |     |      |          |          |     |     |     |     |      |            |
| JS4 (LC537311) [1]             | C G G . T C T . C C . . C . . T T . C A . C G . . . C . C A T . . C G A . A A A C . . . C A . . C T G A . T C C T G C A . G . T G C T C C T G T G A . T C . C C C . . T T C G C . G A T . A T . G C T     |  |  |  |  |  |  |  |  |  |  |  |  |  |  |  |  |  |          |     |     |     |      |          |          |     |     |     |     |      |            |
| JS5 (LC537312) [1]             | C G G . T C T . C C . . C . . T T T C A . C G . . T C . C A T . . C G A . A A A C . . A C A . T C T G A . T G C T C C T G T G A . . . C . C C C . . T T C G C . G A T . A T . G C T                       |  |  |  |  |  |  |  |  |  |  |  |  |  |  |  |  |  |          |     |     |     |      |          |          |     |     |     |     |      |            |
| JS6 (LC537313) [1]             | C G G . T C T . C C C . C . . T T . C A . C G . . T C C C A T . . C G A . A A A C . . . C A . . C T G A C T C C T G C A . G . T G C T C C T G T G A . . . C . C C C . . T T C G C . G A T . A T . G C T   |  |  |  |  |  |  |  |  |  |  |  |  |  |  |  |  |  |          |     |     |     |      |          |          |     |     |     |     |      |            |
| JS7 (LC537314) [1]             | C G G . T C T C C C . C . . T T . C A . C G . . T C . C A T . . C G A . A A A C A . . C A C . C T G A . T C C T G C A . G . T G C T C C T G T G A . . . C . C C C . . T T C G C . G A T . A T . G C T     |  |  |  |  |  |  |  |  |  |  |  |  |  |  |  |  |  |          |     |     |     |      |          |          |     |     |     |     |      |            |
| JS8 (LC537315) [1]             | C G G . T C T . C C . . C C . . T T . C A . C G . . T C C C A T . . C G A . A A A C . . . C A . . C T G A . T C C T G C A . G . T G C T C C T G T G A . . C T C C C . . T T C G C . G A T . A T . G C T   |  |  |  |  |  |  |  |  |  |  |  |  |  |  |  |  |  |          |     |     |     |      |          |          |     |     |     |     |      |            |
| JS9 (LC537316) [1]             | C G G . T C T . C C . . C . . T T . C A . C G . . T C . C A T . . C G A . A A A C . . . C A C . C T G A . T C C T G C A . G . T G C T C C T G T G A . . . C . C C C . . T T C G C . G A T . A T . G C T   |  |  |  |  |  |  |  |  |  |  |  |  |  |  |  |  |  |          |     |     |     |      |          |          |     |     |     |     |      |            |
| JS10 (LC537317) [1]            | C G G . T C T . C C . . C . . T T . C A . C G . . T C . C A T . . C G A . A A A C . . . C A . . C T G A . T C C T G C A . G . T G C T C C T G T G A . T C . C C C . . T T C G C . G A T . A T . G C T     |  |  |  |  |  |  |  |  |  |  |  |  |  |  |  |  |  |          |     |     |     |      |          |          |     |     |     |     |      |            |
| P (DQ124389)                   | C G G . T C T . C C . . C . . T T . C A . C G . . G T C C C A T . . C G A . A A A C . . . C A . . C T G A . T C C T G C A . G . T G C T C C T G T G A . . . C . C . C . . T T C G C . G A T . A T . C Y   |  |  |  |  |  |  |  |  |  |  |  |  |  |  |  |  |  |          |     |     |     |      |          |          |     |     |     |     |      |            |
| P (GU985279)                   | C G G C T C T . C C . R C . C T . . C A T . . . T C . C A T . . C G A . A A A C . . . C A . . C T G A . T . C T G C A . G . T G C T C C T G T G . T . C . C C T A T . C G C . G A T A A T . G C .         |  |  |  |  |  |  |  |  |  |  |  |  |  |  |  |  |  |          |     |     |     |      |          |          |     |     |     |     |      |            |
| P (JQ437479)                   | C G G . T . T . C C . . C . . T . . C A . . . G . T C . C A T . . C G A . . A A C . C A C A . . . . . G A . T . C T G C A C G . T G C T C C T G T G . . . C . C C C . . T . C G C C G A T . A T T G C .   |  |  |  |  |  |  |  |  |  |  |  |  |  |  |  |  |  |          |     |     |     |      |          |          |     |     |     |     |      |            |

b

| position                       | d d                                                                                         |  |  |  |  |  |  |  |  |  |  |  |  |  |  |  |  |  |  |  |  |  |  |  |
|--------------------------------|---------------------------------------------------------------------------------------------|--|--|--|--|--|--|--|--|--|--|--|--|--|--|--|--|--|--|--|--|--|--|--|
| Haplotype (accession Nos.) [N] | T T T T G T T C C C T A A A C T A C G G G T G T C T C T T T T G C C C T C G C T G C A C     |  |  |  |  |  |  |  |  |  |  |  |  |  |  |  |  |  |  |  |  |  |  |  |
| T3(V00654)                     | T T T T G T T C C C T A A A C T A C G G G T G T C T C T T T T G C C C T C G C T G C A C     |  |  |  |  |  |  |  |  |  |  |  |  |  |  |  |  |  |  |  |  |  |  |  |
| JS1 (LC537308)[4]              | C . . . . . T . C G . . T . . . . A . . . . . C T . C . C A . . . C . . T . . . G T         |  |  |  |  |  |  |  |  |  |  |  |  |  |  |  |  |  |  |  |  |  |  |  |
| JS2 (LC537309)                 | C . . . . . T . C G G . T . . . . A . . . . . C T . C . . A . . . C . . T . . . G T         |  |  |  |  |  |  |  |  |  |  |  |  |  |  |  |  |  |  |  |  |  |  |  |
| JS3 (LC537310)[2]              | C . . . . . C . T . C G . . T . . . . A . . . . . C T . C . . A . . . T C . . T . . . G T   |  |  |  |  |  |  |  |  |  |  |  |  |  |  |  |  |  |  |  |  |  |  |  |
| JS4 (LC537311)                 | C . . . . . T . C G . . T . . . . A . . . . . C T . C . . A . . . T C . . T . . . G T       |  |  |  |  |  |  |  |  |  |  |  |  |  |  |  |  |  |  |  |  |  |  |  |
| JS5 (LC537312)                 | C . . . . . T T . C G . . T . . . . A . . . A . T C T . C . . A . . . C . . T . . . G T     |  |  |  |  |  |  |  |  |  |  |  |  |  |  |  |  |  |  |  |  |  |  |  |
| JS6 (LC537313)                 | C . C . . . . T . C G . . T C . . . . A . . . . . C T C C . . A . . . C . . T . . . G T     |  |  |  |  |  |  |  |  |  |  |  |  |  |  |  |  |  |  |  |  |  |  |  |
| JS7 (LC537314)                 | C C . . . . . T . C G . . T . . . . A . . . . . C T . C . . A . . . C . . T . . . G T       |  |  |  |  |  |  |  |  |  |  |  |  |  |  |  |  |  |  |  |  |  |  |  |
| JS8 (LC537315)                 | C . . . . . C . T . C G . . T C . . . . A . . . . . C T . C . . A . . . T C . . T . . . G T |  |  |  |  |  |  |  |  |  |  |  |  |  |  |  |  |  |  |  |  |  |  |  |
| JS9 (LC537316)                 | C . . . . . T . C G . . T . . . . A . . . . . C T . C . . A . . . C . . T . . . G T         |  |  |  |  |  |  |  |  |  |  |  |  |  |  |  |  |  |  |  |  |  |  |  |
| JS10 (LC537317)                | C . . . . . T . C G . . T . . . . A . . . . . C T . C . . A . . . T C . . T . . . G T       |  |  |  |  |  |  |  |  |  |  |  |  |  |  |  |  |  |  |  |  |  |  |  |
| P (DQ124389)                   | C . . . . . T . C G . G T C . . . . A . . . . . C T . C . . A . . . . . T . . . . Y         |  |  |  |  |  |  |  |  |  |  |  |  |  |  |  |  |  |  |  |  |  |  |  |
| P (GU985279)                   | C C . . . R . C . . T . . . T . . . A . . . . . C T . . . . T . . . C T A . . A . G .       |  |  |  |  |  |  |  |  |  |  |  |  |  |  |  |  |  |  |  |  |  |  |  |
| P (JQ437479)                   | C . . . . . G . T . . . . . G . T . . . . . C A . . . . . C . . . . C . . T . G .           |  |  |  |  |  |  |  |  |  |  |  |  |  |  |  |  |  |  |  |  |  |  |  |

**Supplementary Figure S1. Sequence variation observed in entire *Bos taurus* mitogenomes belonging to haplogroup P. a:** Sequence alignment of the ten P haplotypes (JS1-JS10) identified in Japanese Shorthorn cattle and the three previously published (DQ124389, GU985279 and JQ437479) in comparison with the bovine reference sequence (V00654) – a member of haplogroup T3. JS1 and JS3 were detected in four and two subjects, respectively. **b:** Sequence alignment within haplogroup P. An “i” indicates

an insertion, a “d” indicates a deletion. In this study, we carried out, by Next Generation Sequencing (NGS) and using an Illumina MiSeq, entire mitogenome sequencing for 14 samples, one each for the 14 control-region haplotypes previously detected. However, with the new sequencing approach, we were able to identify only ten haplotypes (JS1-JS10) (DDBJ accession numbers: LC537308 - LC537317) in the 14 samples, due to incorrect assignment of the variation obtained by Sanger sequencing in the previous study [20]. The sequences obtained in the previous study were thus corrected and renewed (Accession numbers: LC314264 - LC314271).

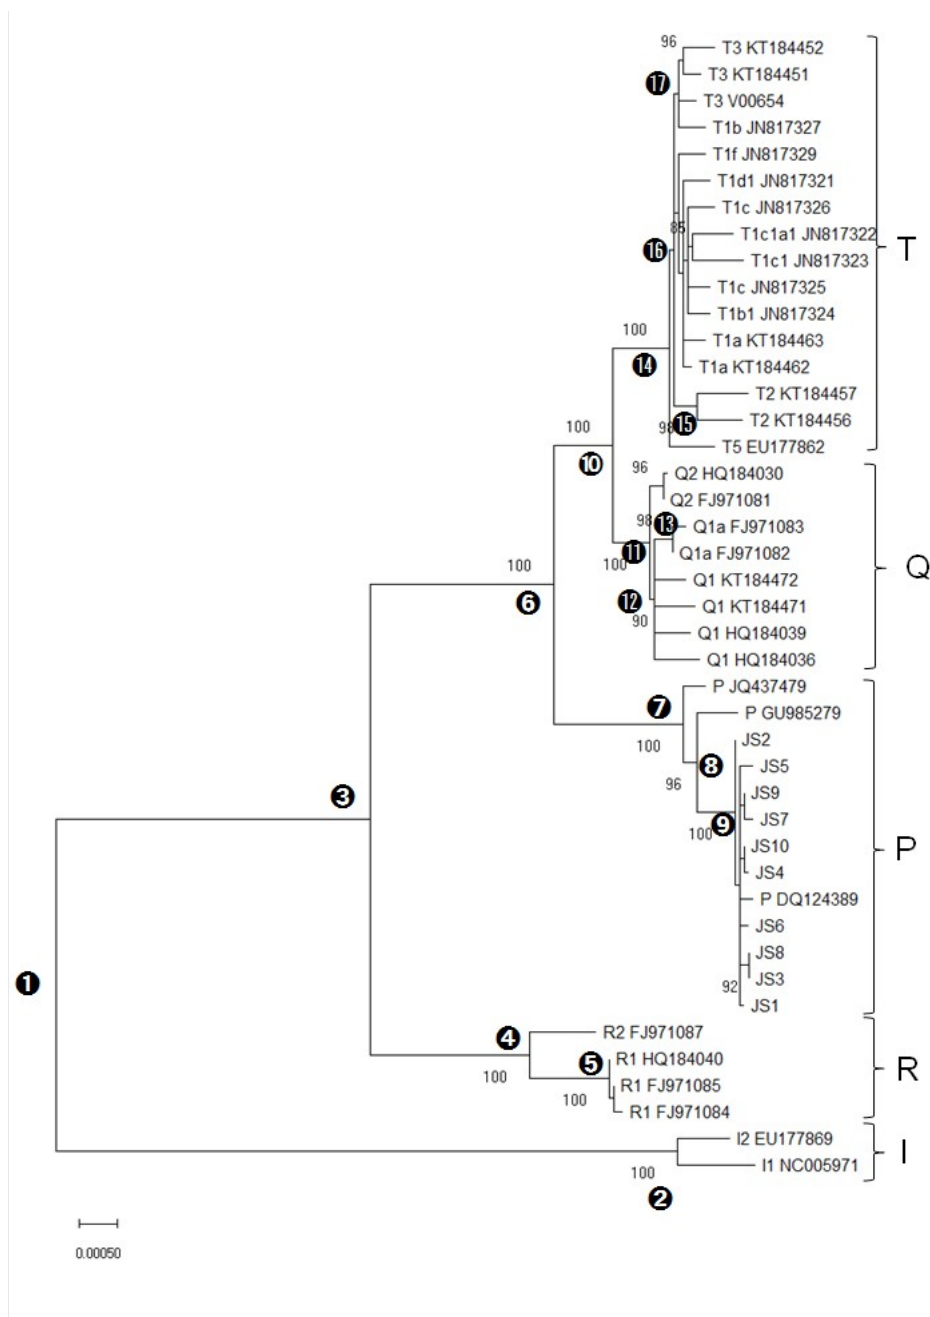

**Supplementary Figure S2. Maximum Likelihood (ML) tree encompassing haplogroup P mitogenomes (13 haplotypes in 18 specimens) as well as representative mitogenomes from other haplogroups.** Sequence alignment was performed using the MEGA package Ver. 7.0 [39]. The phylogenetic tree was constructed by using representative sequences of haplogroups T1, T2, T3, T5, Q1, Q2, R1, R2, I1 and I2, together with all P mitogenomes analyzed in this study. The confidence of the tree was assessed by the bootstrap method of MEGA 7.0, with 1000 replications. Numbers within black circles mark nodes whose coalescence times are provided in Table S1. Scale bar indicates genetic distance.

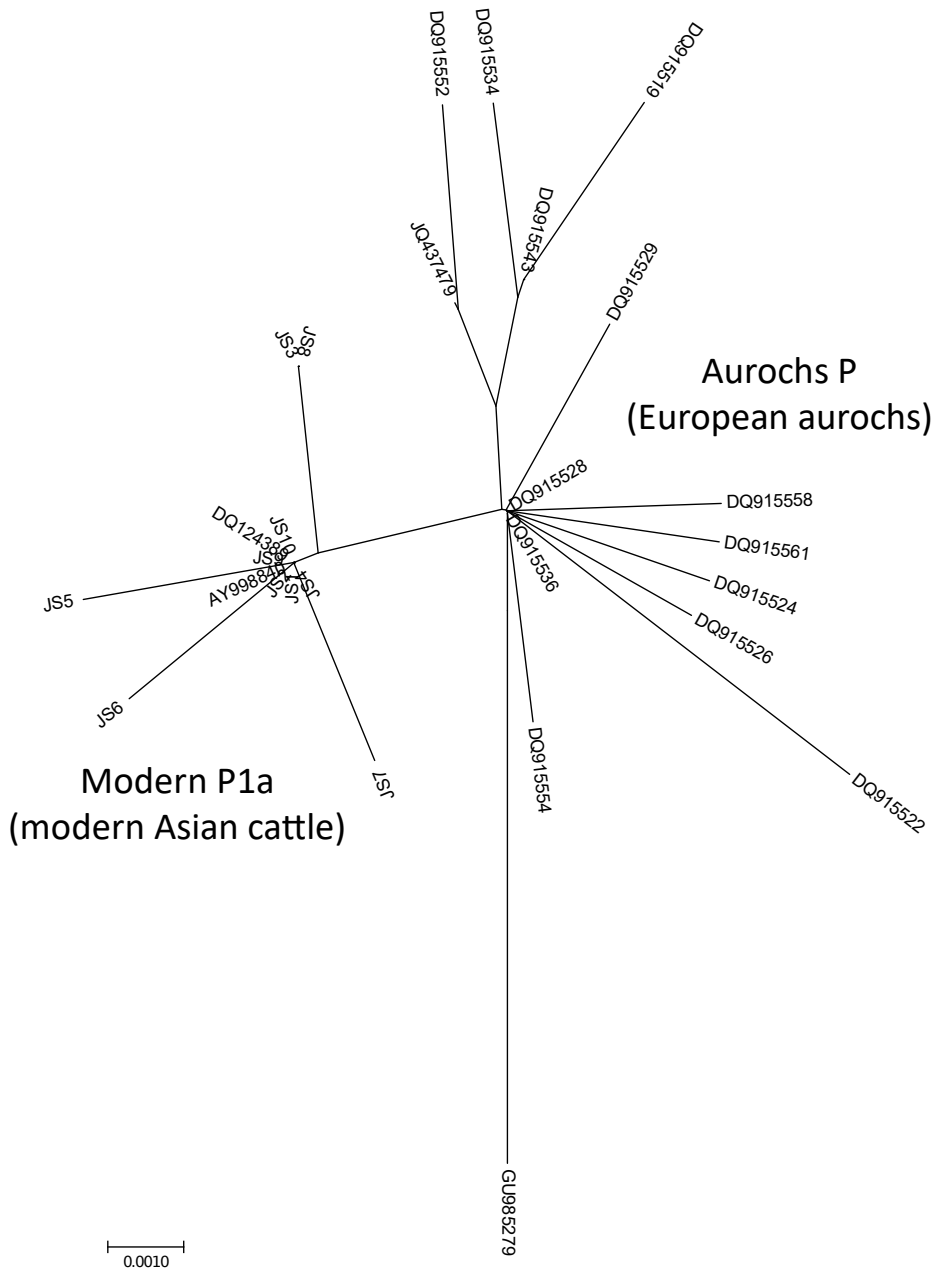

**Supplementary Figure S3. ML tree obtained by using control-region sequences (410-bp) from haplogroup P mtDNAs.** Sequences JS1-S10 were obtained in this study. Sequences from Korea (DQ124389) and China (AY998840) are identical to the JS1 sequence. The other P sequences are from the literature [8,20]. Scale bar indicates genetic distance.
